# Supplementary material for: Predicting Off-Target Binding Profiles With Confidence Using Conformal Prediction
Source: Front Pharmacol. 2018 Nov 6;9:1256. doi: 10.3389/fphar.2018.01256 (PMC6233526; doi:10.3389/fphar.2018.01256)
Supplement: Supplementary file 3 [file Data_Sheet_3.csv]

target_genesymbol	a_pred_both	a_pred_a	a_pred_n	a_pred_none	n_pred_both	n_pred_a	n_pred_n	n_pred_none
ache	4	3	7	0	0	0	8	0
adora2a	0	3	11	0	0	0	4	0
adrb1	3	11	9	0	0	0	5	0
adrb2	3	22	5	0	163	58	137	0
ar	6	50	25	0	58	48	365	0
avpr1a	0	1	1	1	0	0	215	102
cckar	0	0	1	0	0	0	3	0
chrm1	0	39	9	19	0	71	153	72
chrm2	3	12	29	0	0	0	1	0
chrm3	3	7	31	0	0	0	0	0
cnr1	0	5	2	0	0	0	1	0
cnr2	0	4	0	0	0	0	0	0
drd1	0	63	25	8	0	71	167	48
drd2	0	27	5	29	0	2	173	72
ednra	1	0	3	0	0	0	2	0
htr1a	0	22	4	36	0	3	66	33
htr2a	0	17	14	27	0	12	207	65
kcnh2	0	43	23	7	0	36	254	44
lck	9	2	8	0	0	0	5	0
maoa	2	3	8	0	1	0	17	0
nr3c1	0	34	29	9	0	13	399	35
oprd1	1	9	13	0	0	1	2	0
oprk1	0	8	11	5	0	4	154	62
oprm1	0	15	12	9	0	0	8	3
pde3a	0	1	1	0	0	0	0	0
ptgs1	16	3	3	0	3	0	7	0
ptgs2	5	8	5	0	1	0	9	0
scn5a	1	0	4	0	3	0	0	0
slc6a2	13	9	50	0	0	0	2	0
slc6a3	0	12	16	25	0	2	158	66
slc6a4	5	19	41	0	0	1	2	0
